# Supplementary material for: Hepatokine Pregnancy Zone Protein Governs the Diet‐Induced Thermogenesis Through Activating Brown Adipose Tissue
Source: PubMed Central journal article supplement (PMC8564441; doi:10.1002/advs.202101991), 2021-09-13
Supplement: ADVS-8-2101991-s002.pdf [file ADVS-8-2101991-s002.pdf]

## Supplementary table 1 Primers for RT-PCR

| Gene         | Forward primer          | Reverse primer           |
|--------------|-------------------------|--------------------------|
| Serpina12    | AATGTGTATGATGCGGACA     | TACTGCCACCTGCCTCGAA      |
| Mbl2         | AGGAAAACCTCGGCCATCCAG   | TGTTGGGCTCCCCATCATT      |
| C8b          | CCCACAGCAAAGCAAGTTCC    | CGTGTACTCGTAGATGCCCC     |
| Cyp2c29      | ATGACCTCTTTGGTGCAGGG    | TAGTGGGGAGGAGGTCGATG     |
| Cbp2         | CTCACAAGAACAACCGCTGC    | TCACCTCTGGCTCAGACTCA     |
| Cyp2c44      | GTGAAGGAGCACCAGGAGTC    | TTGGCTTGCACCTCTGGATG     |
| Afm          | CTTTGAGCATCTGAAAGCTGAT  | TTGTGAACAAGCACAGCCAC     |
| Cyp2c50      | CCAATGGCTCACCTGTGAT     | CCGTTTTCTGCAACCAAGG      |
| Mbl1         | GAGAACCAGGTCAAGGGCTC    | TGCCAGCTTCTCCTCAATGG     |
| Masp1        | CCGGAGGGGTTTCGAATCAA    | GGTCTGCTCAGTATCGGTGG     |
| Lipc         | GCAGCTTCAGCCAAGGTCTA    | CTTTTGTCCAGCAGCGAC       |
| Cyp2c70      | TTGTGGCTTTCTCAGCAGGA    | AACTGGCTTGGTGTGCGATG     |
| Hgfac        | CCACGGATGTGACACAGACA    | ACATTTTCATCCATGTGGCCC    |
| Fgb          | ACGATGAACCGACGGATAGC    | TCTGGTTGGCAGTAGCCTTG     |
| Saa4         | AGAGCCTATCGGGACAACCT    | CATTCCTCGGCTTTCTGGGT     |
| Itih4        | GCCCTCCGTTGCACAATATC    | AGACCCTGACTGGGGTCTAC     |
| Acadm        | ACTCGAAAGCGGCTCACAA     | ACGGGGATAATCTCCTCTCTGG   |
| Atgl         | ATATCCCACTTTAGCTCCAAGG  | CAAGTTGTCTGAAATGCCGC     |
| Cd11c        | TTCAAGGAGACAAAGACCCG    | AGAGAAAAGTTGAGGGCAAGAG   |
| Cd36         | GCGACATGATTAATGGCACAG   | GATCCGAACACAGCGTAGATAG   |
| Cebpb        | TGACGCAACACACGTGTAAGTG  | AAACAACCCCGCAGGAACAT     |
| Cpt1a        | AGACAAGAACCCCAACATCC    | CAAAGGTGTCAAATGGGAAGG    |
| Cyclophilina | CAAATGCTGGACCAAACACAA   | GCCATCCAGCCATTCAGTCT     |
| F4/80        | CTTTGGCTATGGGCTTCCAGTC  | GCAAGGAGGACAGAGTTTATCGTG |
| Hsl          | CTGAGATTGAGGTGCTGTCG    | CAAGGGAGGTGAGATGGTAAC    |
| iNos         | GCAAACATCACATTTCAGATCCC | TCAGCCTCATGGTAAACACG     |
| Mcp1         | GGAGAGCTACAAGAGGATCAC   | TGATCTCATTGGTTCCGATCC    |
| Pgc1a        | ACAGCTTTCTGGGTGGATTG    | TGAGGACCGCTAGCAAGTTT     |
| Ppara        | AGCCTCAGCCAAGTTGAAGT    | TGGGGAGAGAGGACAGATGG     |
| Pparg2       | TCGCTGCTGCACTGCCTCTG    | GAGAGGTCCACAGAGCTGATT    |
| Pzp          | ACCCATATACAAACCAGGACAG  | CTGCCAGATGGATATTTTGCC    |
| Prdm16       | GAAGTCACAGGAGGACACGG    | CTCGCTCCTCAACACACCTC     |
| Ucp1         | GGCAAAAACAGAAGGATTGC    | TAAGCCGGCTGAGATCTTGT     |
| Tnfa         | TGGGCCTCTCATGCACCACC    | GAGGCAACCTGACCACTCTCCCT  |

Table S2 Blood parameters of animals

|                     | Insulin ( $\mu$ IU/ml) | Free fatty acid (mM) | Cholesterol (mg/dL) | Triglyceride (mg/dL) |
|---------------------|------------------------|----------------------|---------------------|----------------------|
| PZP WT              | 17.68 $\pm$ 1.20       | 0.25 $\pm$ 0.02      | 140.38 $\pm$ 3.91   | 80.45 $\pm$ 1.39     |
| PZP KO              | 19.79 $\pm$ 1.01       | 0.32 $\pm$ 0.01 *    | 153.27 $\pm$ 3.26 * | 87.67 $\pm$ 2.49 *   |
|                     |                        |                      |                     |                      |
| WT control          | 16.53 $\pm$ 0.90       | 0.21 $\pm$ 0.02      | 142.5 $\pm$ 2.91    | 99.11 $\pm$ 3.1      |
| WT PZP protein      | 13.24 $\pm$ 0.63**     | 0.15 $\pm$ 0.02      | 129.38 $\pm$ 2.65 * | 84.44 $\pm$ 1.94 **  |
| UCP1-/- control     | 16.18 $\pm$ 0.91       | 0.17 $\pm$ 0.01      | 169.8 $\pm$ 5.73    | 65.8 $\pm$ 2.19      |
| UCP1-/- PZP protein | 16 $\pm$ 0.94          | 0.30 $\pm$ 0.05      | 170.89 $\pm$ 5.14   | 68.11 $\pm$ 3.44     |
|                     |                        |                      |                     |                      |
| PZP KO +control     | 11.28 $\pm$ 0.82       | 0.30 $\pm$ 0.01      | 162.33 $\pm$ 5.67   | 120.17 $\pm$ 8.64    |
| PZP KO +PZP protein | 10.55 $\pm$ 0.94       | 0.23 $\pm$ 0.01 *    | 139.29 $\pm$ 3.62 * | 127.57 $\pm$ 3.72    |
|                     |                        |                      |                     |                      |

one-way ANOVA with multiple comparisons and Tukey's post-test were performed; \*\*P < 0.01 and \*P < 0.05 were considered to be significant.

Table S3 clinical parameters of BMI figure

| ID    | PZP concentration (ug/ml) | sex    | age | height (cm) | weight (kg) | BMI   |
|-------|---------------------------|--------|-----|-------------|-------------|-------|
| F0003 | 5.17                      | female | 68  | 150         | 80          | 35.56 |
| F0007 | 1.52                      | female | 69  | 161         | 80          | 30.86 |
| F0011 | 5.19                      | female | 54  | 168         | 95          | 33.66 |
| F0012 | 5.8                       | female | 49  | 172         | 120         | 40.56 |
| F0013 | 2.16                      | male   | 30  | 182         | 132         | 39.85 |
| F0015 | 1.83                      | female | 36  | 165         | 83          | 30.49 |
| F0016 | 3.18                      | female | 22  | 168         | 128         | 45.35 |
| F0018 | 2.75                      | female | 18  | 170         | 183         | 63.32 |
| F0019 | 2                         | female | 16  | 160         | 105         | 41.02 |
| F0020 | 2.17                      | male   | 65  | 175         | 108         | 35.27 |
| F0022 | 2.56                      | male   |     | 185         | 128         | 37.4  |
| F0024 | 1.86                      | female | 49  | 165         | 80          | 29.38 |
| F0025 | 2.88                      | female | 27  | 164         | 85          | 31.6  |
| F0026 | 1.93                      | female | 15  | 176         | 128         | 41.32 |
| F0029 | 2.07                      | male   | 24  | 178         | 115         | 36.3  |
| F0030 | 3.24                      | female | 24  | 168         | 111         | 39.33 |
| F0031 | 2.05                      | female | 49  | 158         | 75          | 30.04 |
| F0035 | 2.11                      | female | 58  | 159         | 110         | 43.51 |
| H0010 | 2.49                      | female | 51  | 160         | 65          | 25.39 |
| H0017 | 1.81                      | male   | 45  | 176         | 76          | 24.54 |
| H0020 | 1.97                      | male   | 51  | 170         | 77          | 26.64 |
| H0033 | 5.12                      | male   | 51  | 170         | 75          | 25.95 |
| H0034 | 3.58                      | male   | 34  | 178         | 80          | 25.25 |
| H0037 | 3.03                      | male   | 48  | 170         | 70          | 24.22 |
| H0040 | 3.05                      | male   | 32  | 175         | 75          | 24.49 |
| L0001 | 3.27                      | male   | 61  | 175         | 73          | 23.84 |
| L0003 | 8.49                      | female | 66  | 165         | 64          | 23.51 |
| L0026 | 3.03                      | male   | 74  | 164         | 58          | 21.56 |
| L0030 | 1.62                      | female | 54  | 163         | 63          | 23.71 |
| L0032 | 9.35                      | female | 35  | 164         | 55          | 20.45 |
| L0037 | 4.49                      | female | 49  | 168         | 68.8        | 24.38 |
| L0039 | 1.46                      | female | 49  | 150         | 55          | 24.44 |
| L0040 | 3.05                      | female | 57  | 161         | 61          | 23.53 |
| L0042 | 18.21                     | female | 46  | 168         | 57          | 20.2  |
| L0043 | 4.56                      | female | 41  | 162         | 46          | 17.53 |
| L0045 | 4.06                      | female | 56  | 160         | 59          | 23.05 |
| L0046 | 11.2                      | female | 39  | 155         | 57          | 23.73 |
| L0047 | 7.77                      | female | 36  | 160         | 57.5        | 22.46 |
| L0048 | 2.23                      | male   | 53  | 172         | 69          | 23.32 |
| L0049 | 8.92                      | female | 35  | 168         | 64          | 22.68 |
| L0050 | 2.82                      | male   | 52  | 170         | 65          | 22.49 |
| L0051 | 2.94                      | female | 51  | 162         | 56          | 21.34 |
| L0054 | 3.04                      | male   | 44  | 172         | 65          | 21.97 |
| L0055 | 4.12                      | female | 27  | 155         | 50          | 20.81 |

Table S4 clinical parameters of OGTT figure

| ID | PZP concentration<br>(ug/ml) |         | sex    | age | height<br>(cm) | weight<br>(kg) | BMI  |
|----|------------------------------|---------|--------|-----|----------------|----------------|------|
|    | OGTT 0h                      | OGTT 2h |        |     |                |                |      |
| 1  | 2.07                         | 4.63    | male   | 62  | 173            | 65             | 21.7 |
| 2  | 1.85                         | 2.97    | male   | 65  | 179            | 90             | 28.1 |
| 3  | 1.96                         | 3.99    | male   | 32  | 170            | 85             | 29.4 |
| 4  | 13.13                        | 15.53   | female | 29  | 173            | 63             | 21   |
| 5  | 1.53                         | 2.26    | male   | 31  | 184            | 90             | 26.6 |
| 6  | 1.54                         | 1.76    | female | 44  | 165            | 70             | 25.7 |
| 7  | 2.17                         | 8.33    | female | 49  | 160            | 62             | 24.2 |
| 8  | 1.66                         | 3.21    | male   | 28  | 169            | 80             | 28   |
| 9  | 3.51                         | 2.73    | male   | 68  | 182            | 75             | 22.6 |
| 10 | 3.62                         | 4.09    | female | 23  | 170            | 63             | 21.8 |
| 11 | 3.18                         | 3.24    | female | 56  | 158            | 55             | 22   |
| 12 | 7.85                         | 8.12    | male   | 37  | 175            | 65             | 21.2 |
| 13 | 2.96                         | 3.82    | male   | 69  | 173            | 73             | 24.4 |
| 14 | 3.28                         | 3.38    | male   | 72  | 169            | 74             | 25.9 |
| 15 | 1.89                         | 2.22    | female | 54  | 155            | 62.5           | 26   |
| 16 | 2.44                         | 2.33    | female | 60  | 158            | 58             | 23.2 |
| 17 | 1.47                         | 6.48    | female | 35  | 158            | 68             | 27.2 |
| 18 | 1.67                         | 4.56    | male   | 32  | 175            | 90             | 29.4 |
| 19 | 29.65                        | 33.20   | female | 25  | 161            | 51             | 19.7 |
| 20 | 2.46                         | 13.47   | female | 56  | 161            | 60             | 23.1 |
| 21 | 2.05                         | 3.66    | female | 35  | 161            | 54             | 20.8 |
| 22 | 4.60                         | 4.59    | male   | 33  | 183            | 78             | 23.3 |
| 23 | 8.61                         | 20.31   | male   | 52  | 182            | 70             | 21.1 |
| 24 | 2.07                         | 1.98    | male   | 55  | 168            | 76             | 26.9 |
